# Supplementary material for: MURC deficiency in smooth muscle attenuates pulmonary hypertension
Source: PubMed Central journal article supplement (PMC4996946; doi:10.1038/ncomms12417), 2016-08-22
Supplement: ncomms12417-s1.pdf [file ncomms12417-s1.pdf]

**a**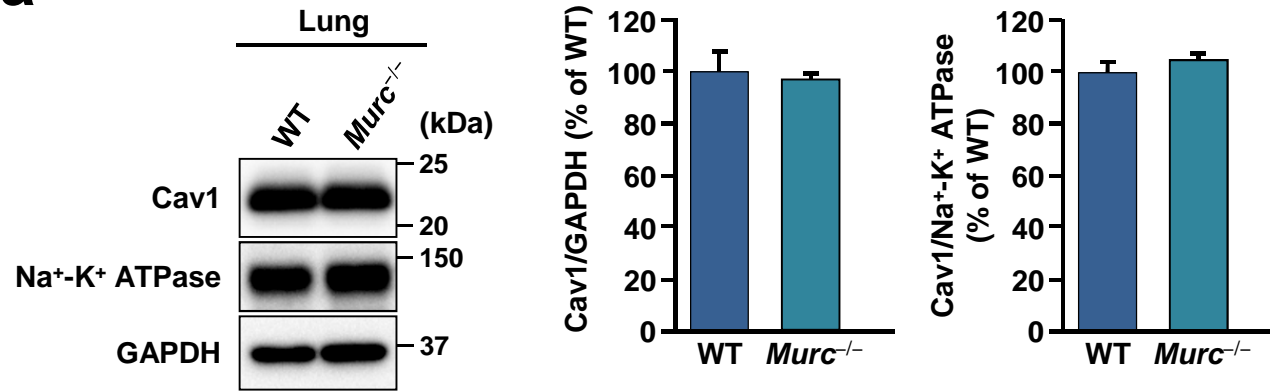**b**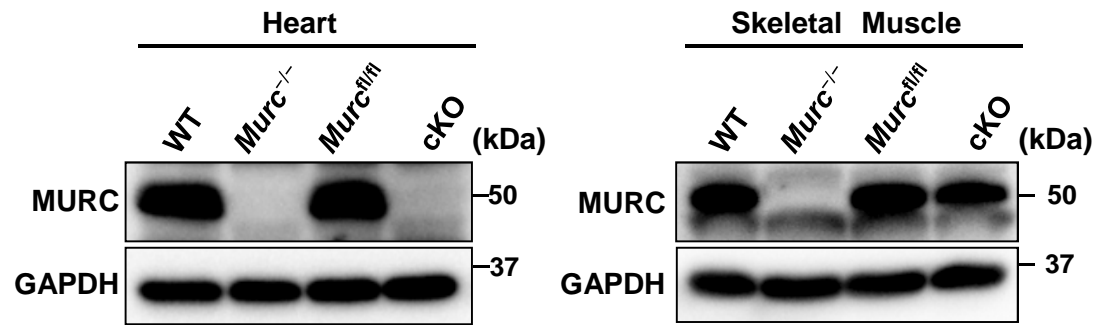**c**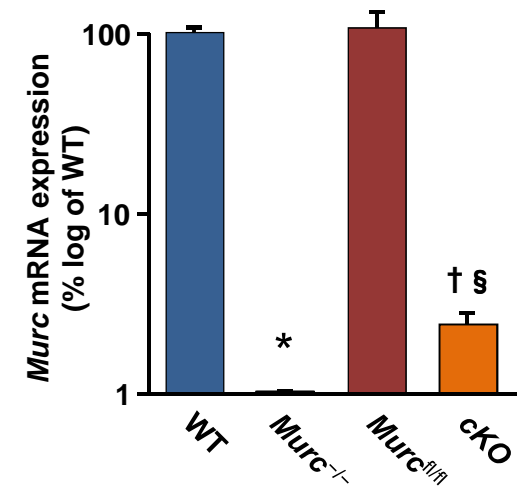

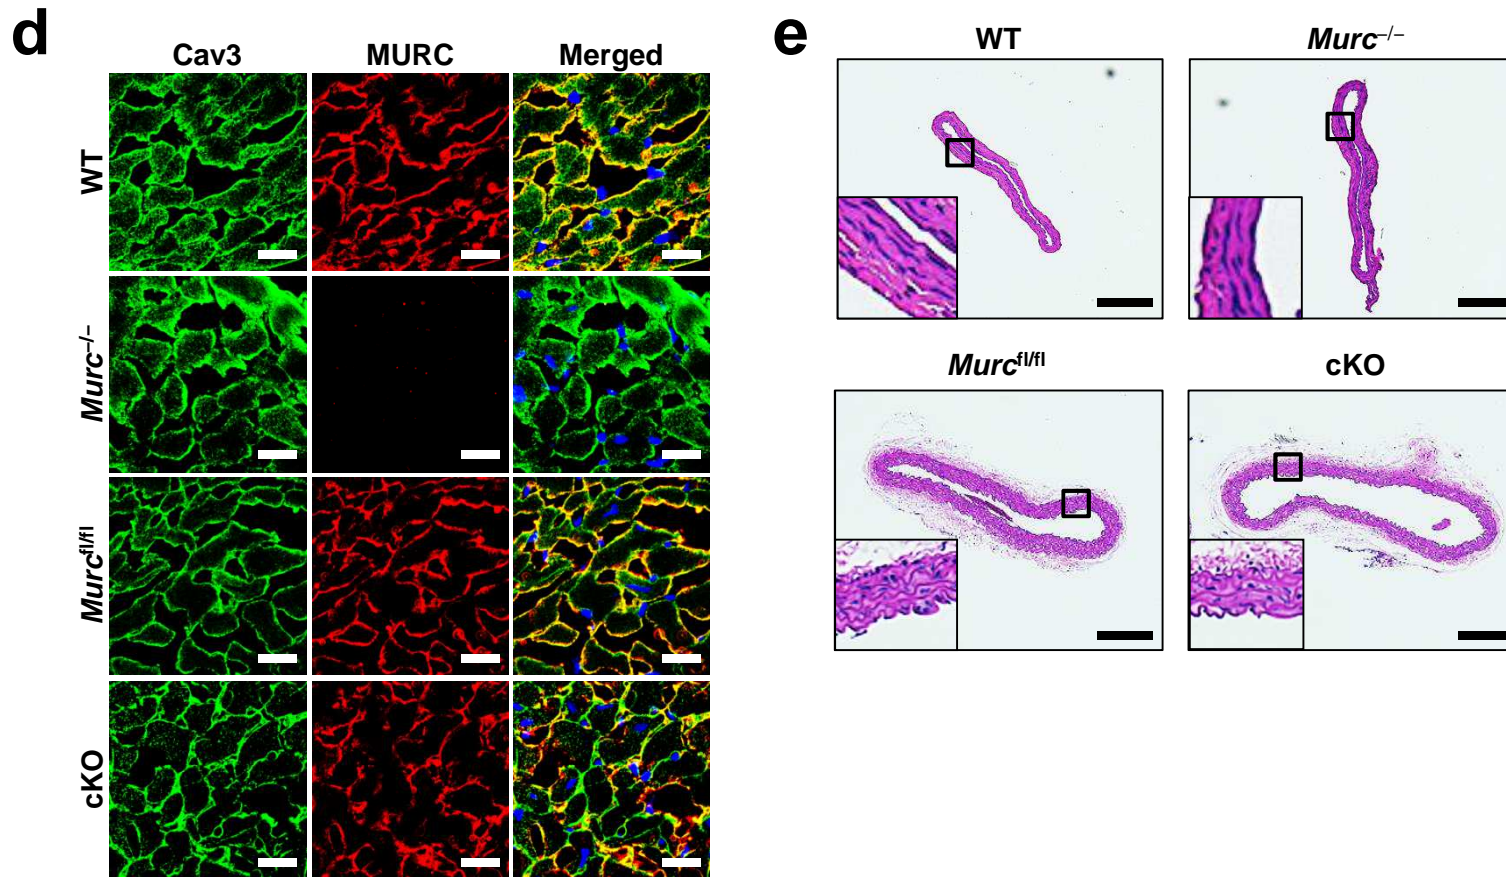

**Supplementary Figure 1. The heart, skeletal muscle, and aorta in cKO mice.**

(a) Cav1 protein expression in WT in *Murc*<sup>-/-</sup> lungs. Cav1 protein expression in *Murc*<sup>-/-</sup> lungs was not significantly different from that in WT lungs (n = 3 per group). (b) Murc protein expression was examined in the heart and skeletal muscle of WT, *Murc*<sup>-/-</sup>, *Murc*<sup>fl/fl</sup>, and cKO mice. (c) Murc mRNA expression was examined in the heart and skeletal muscle of WT, *Murc*<sup>-/-</sup>, *Murc*<sup>fl/fl</sup>, and cKO mice (n = 3 per group). \**P*<0.05 compared with WT mice, †*P*<0.05 compared with *Murc*<sup>fl/fl</sup> mice, §*P*<0.05 compared with *Murc*<sup>-/-</sup> mice. (d) Representative immunostaining images of Murc and Cav3 in the heart of WT, *Murc*<sup>-/-</sup>, *Murc*<sup>fl/fl</sup>, and cKO mice. Bar, 20 μm. (e) Representative H & E staining images of the aorta in WT, *Murc*<sup>-/-</sup>, *Murc*<sup>fl/fl</sup>, and cKO mice. Bar, 200 μm. Data are presented as mean ± SEM. Uncropped images of blots are shown in Supplementary Fig. 6.

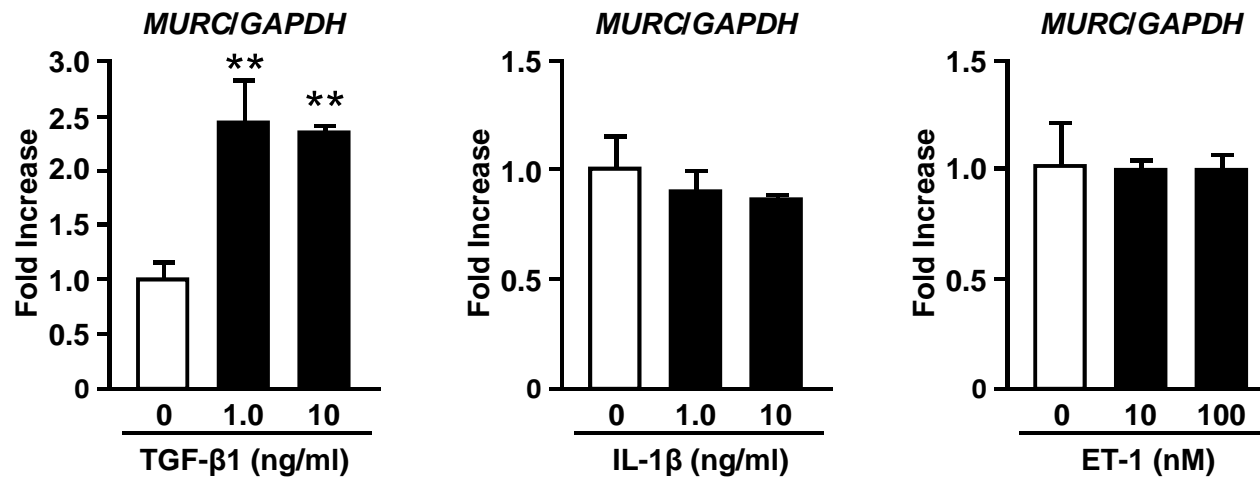

**Supplementary Figure 2. Induction of *MURC* mRNA expression by TGF-β1 in hPASMCs.**

hPASMCs were treated with TGF-β1 for 24 hrs, IL-1β for 24 hrs, or ET-1 for 16 hrs (n = 3 per group). \*\* $P < 0.01$  compared with hPASMCs without a stimulation. Data are presented as mean  $\pm$  SEM.

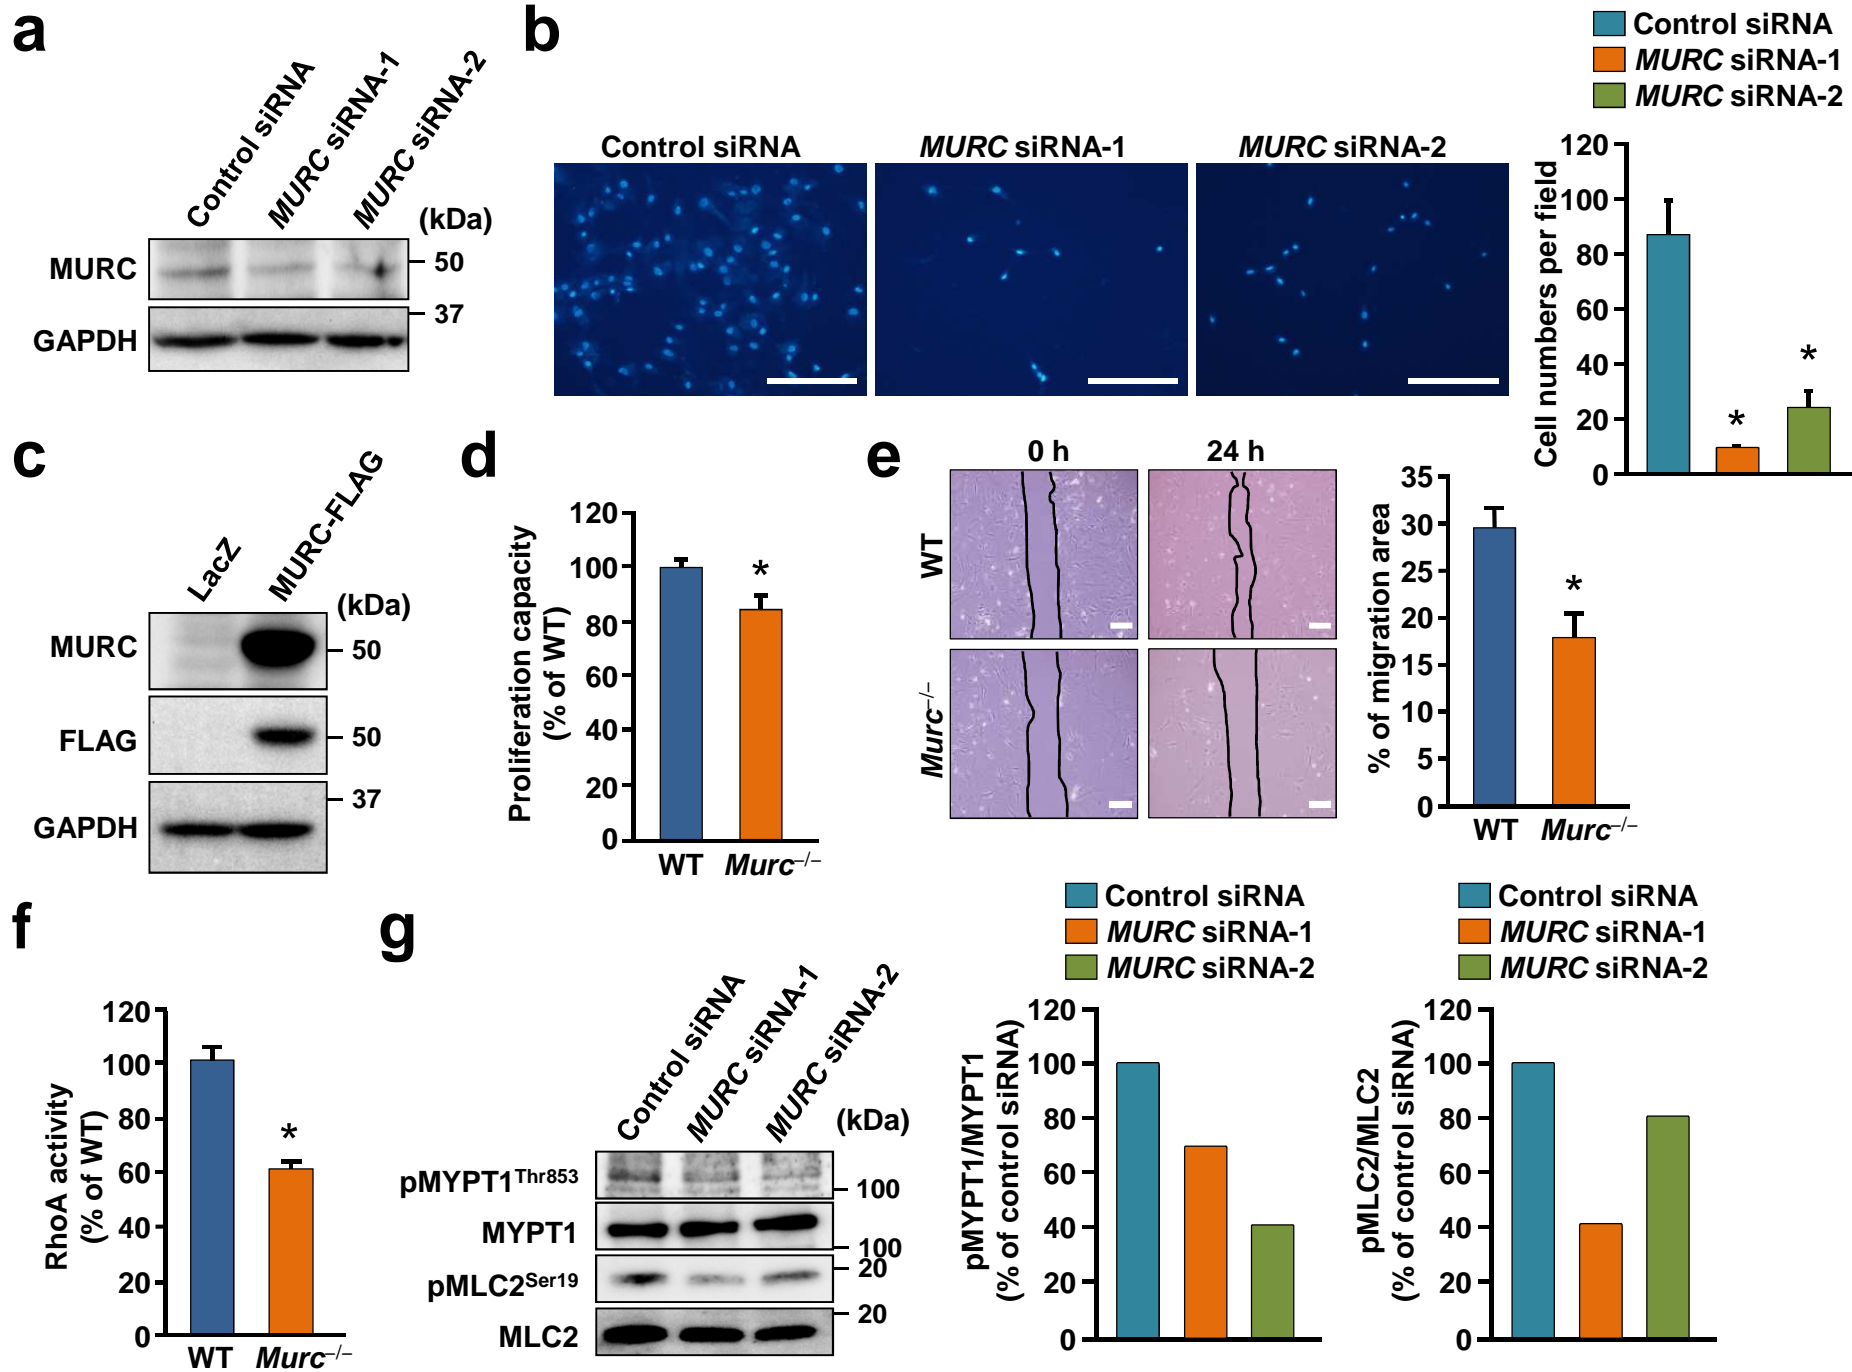

**h**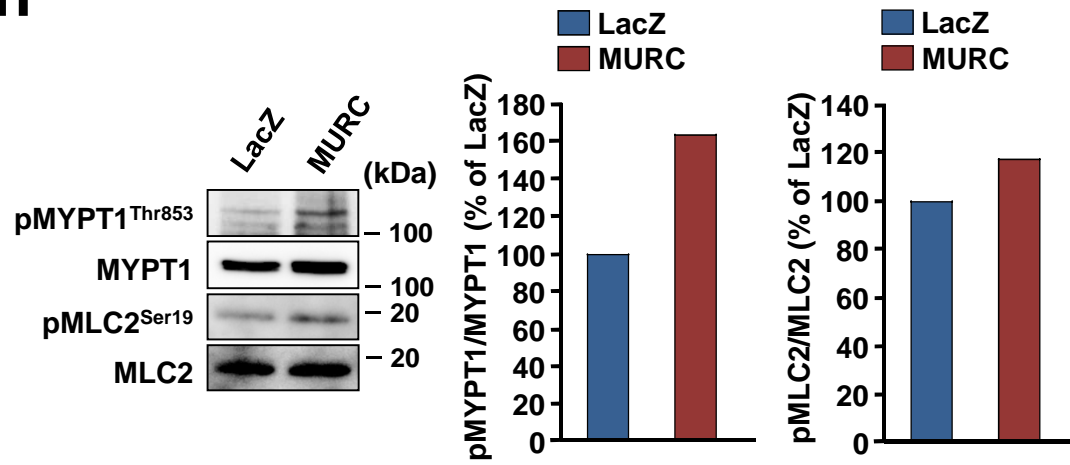**i**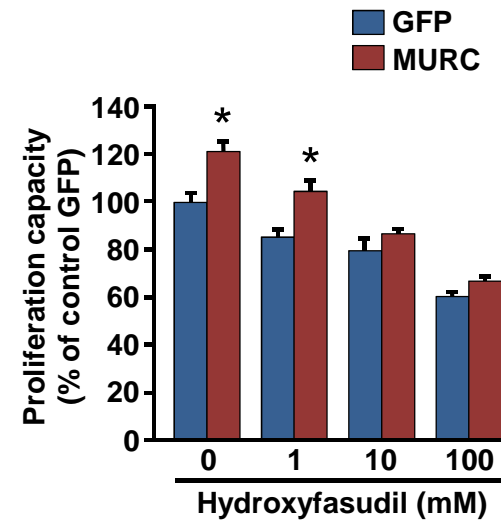**j**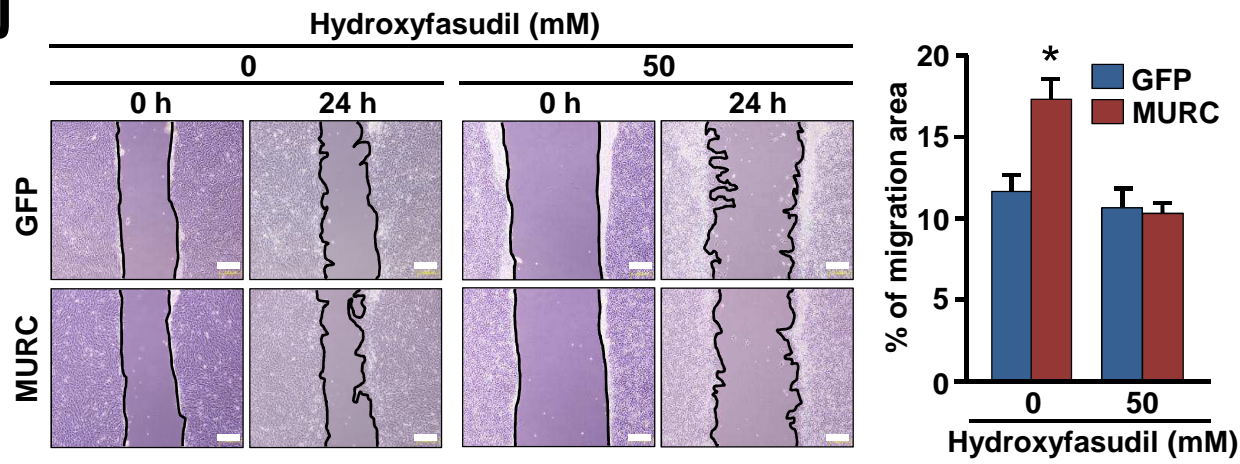**k**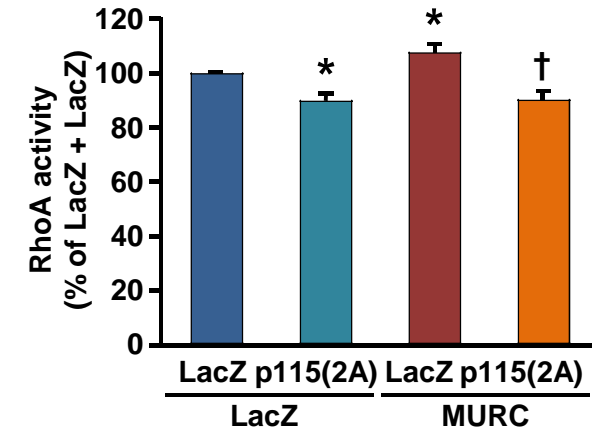

### Supplementary Figure 3. Attenuation of proliferation, migration, and RhoA activity in MURC-deficient SMCs.

(a) Lysates from hPASMCs transfected with control siRNA or *MURC* siRNA were immunoblotted with an anti-MURC antibody. (b) Left, representative images of a transwell migration assay using hPASMCs transfected with control siRNA or *MURC* siRNA. Bar, 200  $\mu$ m. Right, quantification of migrated hPASMCs (n = 8 per group). \* $P$ <0.05 compared with control siRNA. (c) Lysates from hPASMCs transduced with a retrovirus expressing LacZ or MURC-FLAG were immunoblotted with anti-MURC and anti-FLAG antibodies. (d) The proliferation capacities of WT and *Murc*<sup>-/-</sup> VSMCs treated with FBS were assessed using a WST-1 cell proliferation assay system (n = 3 per group). \* $P$ <0.05 compared with WT VSMCs. (e) The migration of WT and *Murc*<sup>-/-</sup> VSMCs was assessed by a wound healing assay (n = 4 per group). Wound closure was quantified by the percent change in the wound area. Bar, 100  $\mu$ m. \* $P$ <0.05 compared with WT VSMCs. (f) RhoA activity was measured in WT and *Murc*<sup>-/-</sup> VSMCs (n = 3 per group). Starved cells were stimulated with 1% FBS for 1 h. \* $P$ <0.05 compared with WT VSMCs. (g) The phosphorylation of MYPT1 and MLC2 was assessed in hPASMCs transfected with control siRNA or *MURC* siRNAs. Starved cells were stimulated with 1% FBS for 1 h. (h) The phosphorylation of MYPT1 and MLC2 was assessed in LacZ- and MURC-overexpressing hPASMCs. (i) Attenuation of MURC-induced proliferation in VSMCs by the ROCK inhibitor, hydroxyfasudil. The proliferation capacities of GFP- and MURC-overexpressing rat VSMCs were assessed using a WST-1 cell proliferation assay system (n = 3-4 per group). \* $P$ <0.05 compared with GFP-overexpressing VSMCs. (j) Attenuation of MURC-induced migration in VSMCs by the ROCK inhibitor, hydroxyfasudil. The migration capacities of GFP- and MURC-overexpressing rat VSMCs were assessed by a wound healing assay (n = 3-4 per group). Wound closure was quantified by the percent change in the wound area. \* $P$ <0.05 compared with GFP-overexpressing VSMCs. (k) RhoA activity was assessed in hPASMCs transduced with LacZ + LacZ, LacZ + p115RhoGEF(2A) [p115(2A)], MURC-FLAG + LacZ, and MURC-FLAG + p115(2A) (n = 7 per group). hPASMCs were infected with a puromycin-resistant retrovirus expressing LacZ and MURC-FLAG. After being selected using puromycin, hPASMCs were infected with a hygromycin-resistant retrovirus expressing LacZ and p115(2A), and subsequently selected using hygromycin. \* $P$ <0.05 compared with LacZ + LacZ, † $P$ <0.05 compared with MURC + LacZ. Data are presented as mean  $\pm$  SEM. Uncropped images of blots are shown in Supplementary Fig. 6.

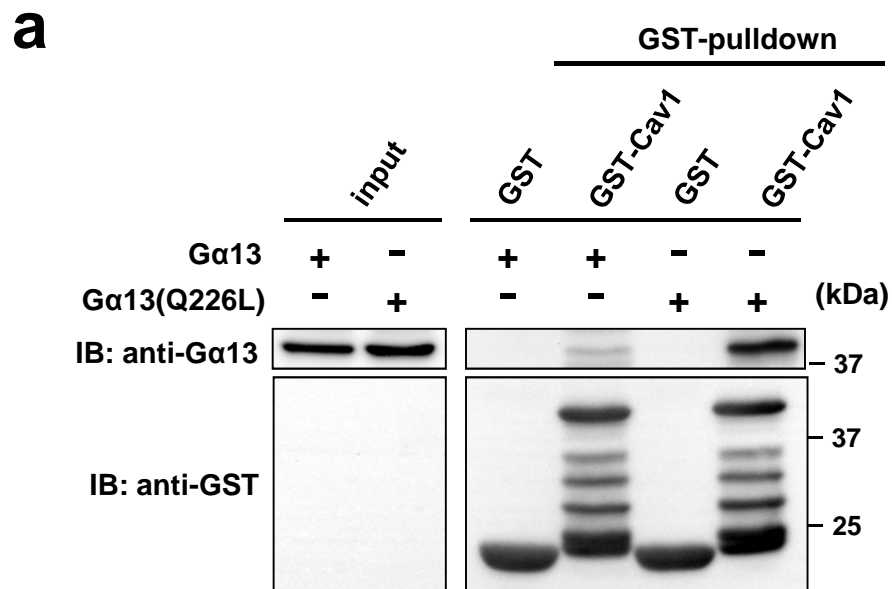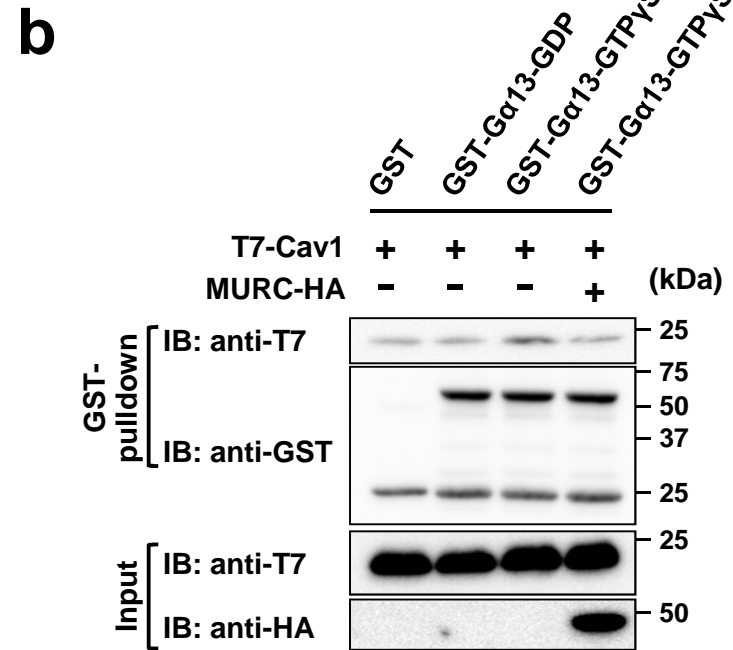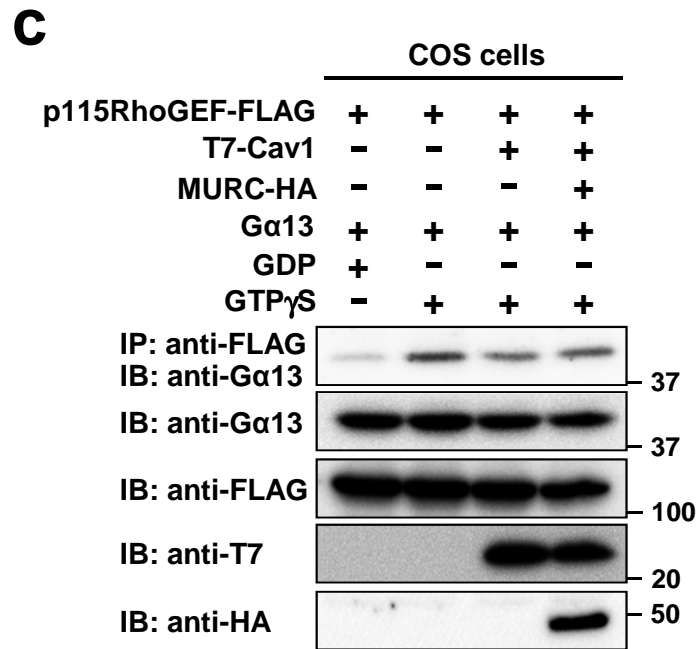

**Supplementary Figure 4. Inhibition of the association of Cav1 with Gα13 by MURC.**

(a) COS cells were transfected with plasmids expressing Gα13 and Gα13(Q226L). GST pulldown was performed with GST fusion Cav1 conjugated to glutathione-Sepharose beads and the COS cell lysates. Precipitated proteins were blotted with anti-Gα13 and anti-GST antibodies. (b) GST fusion Gα13 conjugated to glutathione-Sepharose beads was preloaded with GDP or GTPγS. GST pulldown was performed with COS cell lysates transfected with plasmids expressing the indicated proteins. Precipitated proteins were blotted with anti-T7 and anti-GST antibodies. (c) COS cells were transfected with pCS2FLAG-hp115RhoGEF and/or pcDNA3.1-T7-hCav1, pcDNA3.1-hMURC-HA, and pcDNA3.1-hGα13, and cell lysates were immunoprecipitated with the anti-FLAG antibody. Uncropped images of blots are shown in Supplementary Fig. 6.

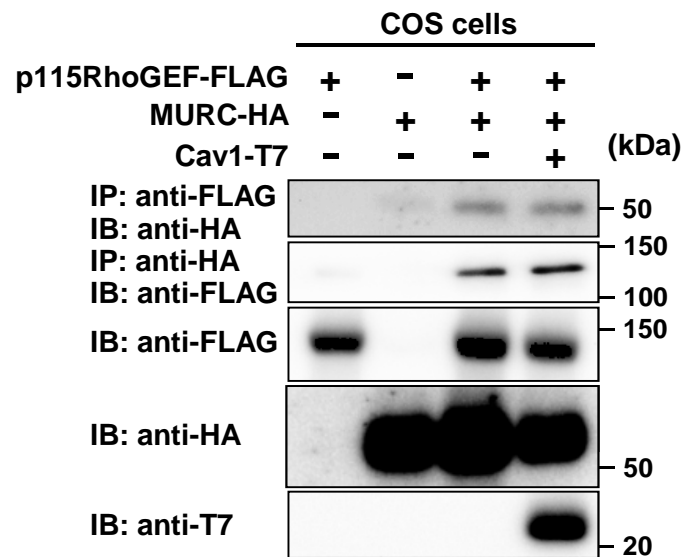

**Supplementary Figure 5. Association of p115RhoGEF with MURC.**

COS cells were transfected with pCS2FLAG-hp115RhoGEF, pcDNA3.1-hMURC-HA, and/or pcDNA3.1-T7-hCav1. Cell lysates were immunoprecipitated with anti-FLAG and anti-HA antibodies. Uncropped images of blots are shown in Supplementary Fig. 6.



**Fig. 1b**

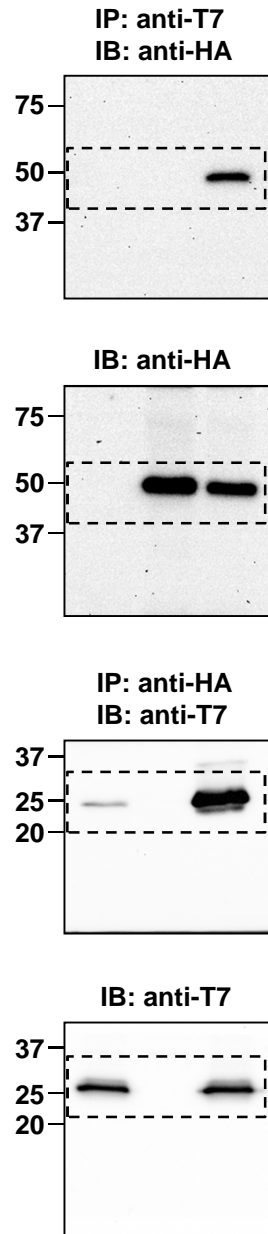

**Fig. 1c**

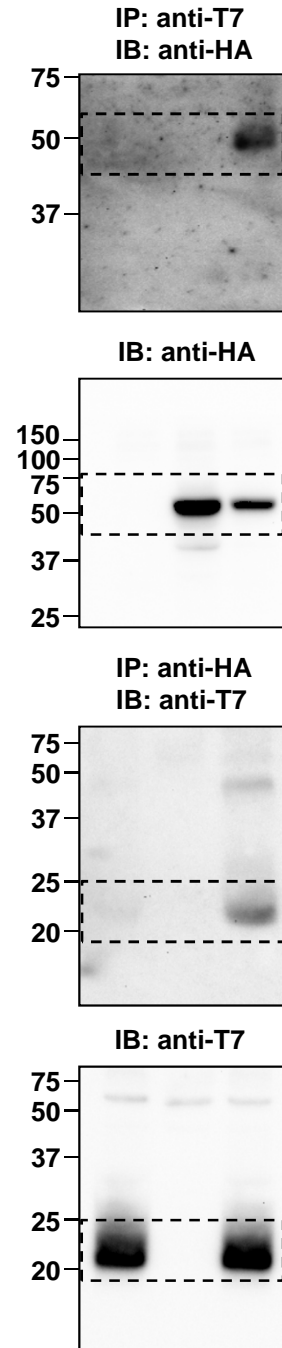

**Fig. 2b**

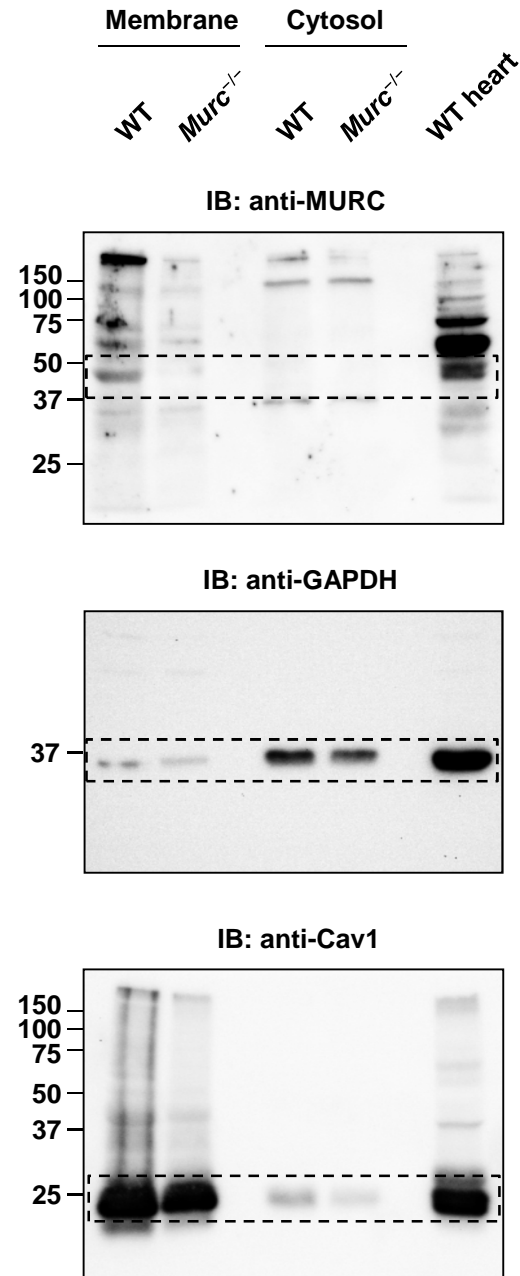

**Fig. 3a**

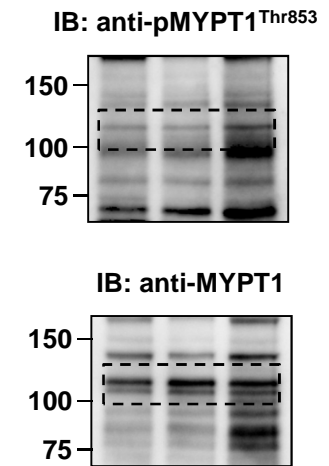

**Fig. 3c**

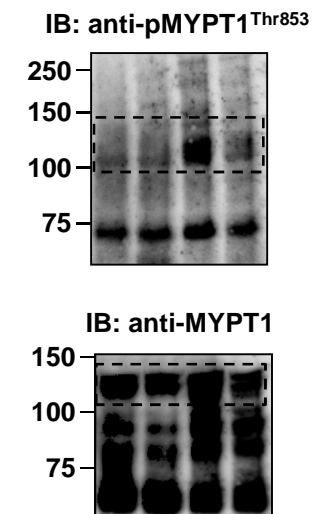

**Fig. 3e**

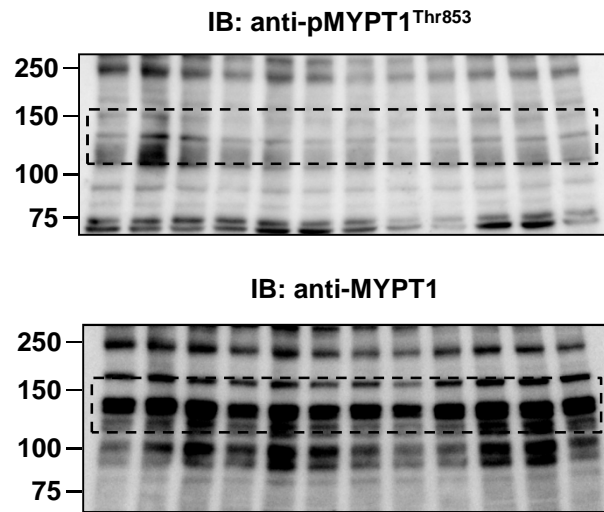

**Fig. 4a**

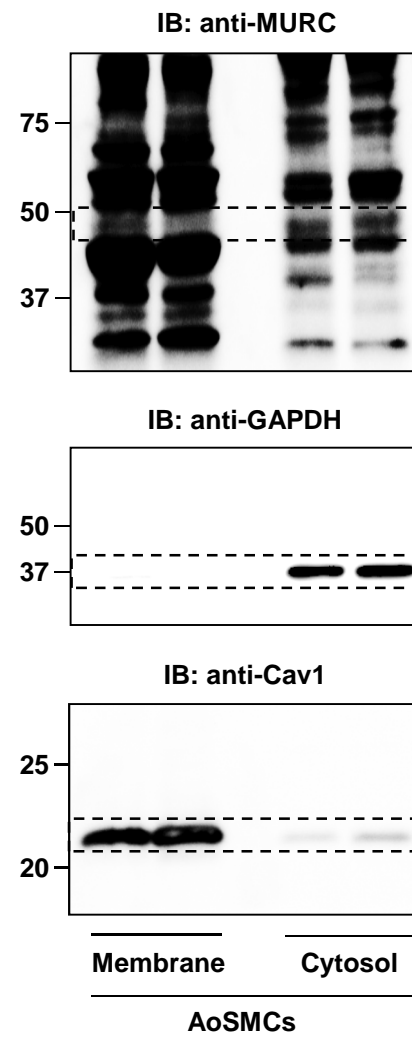

**Fig. 3f**

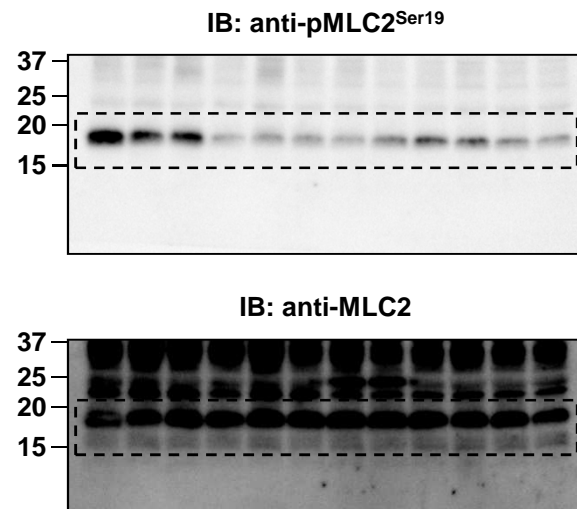

**Fig. 6a**

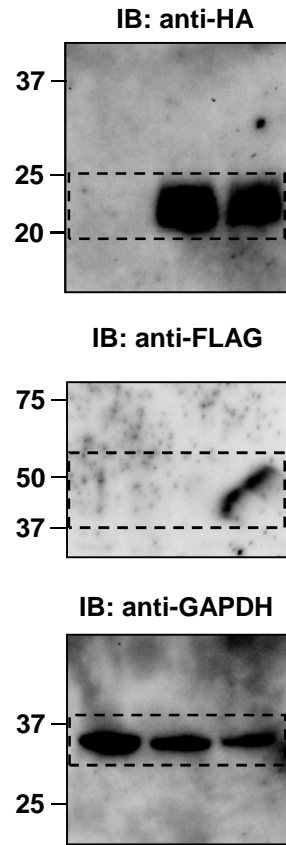

**Fig. 6b**

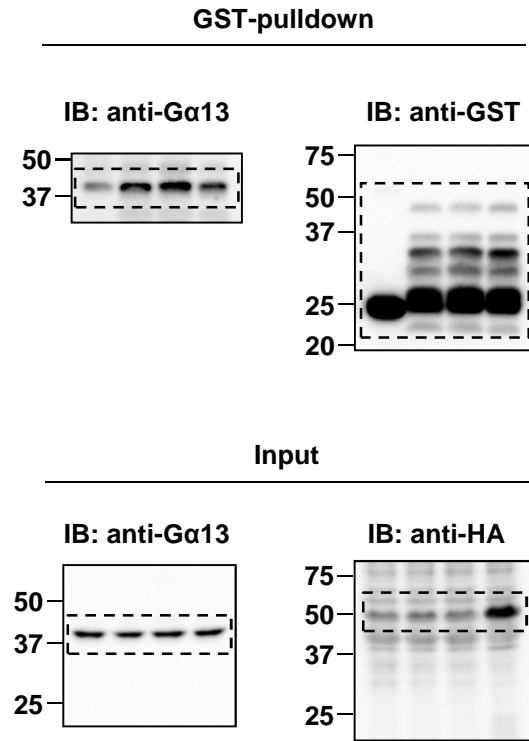

**Fig. 6c**

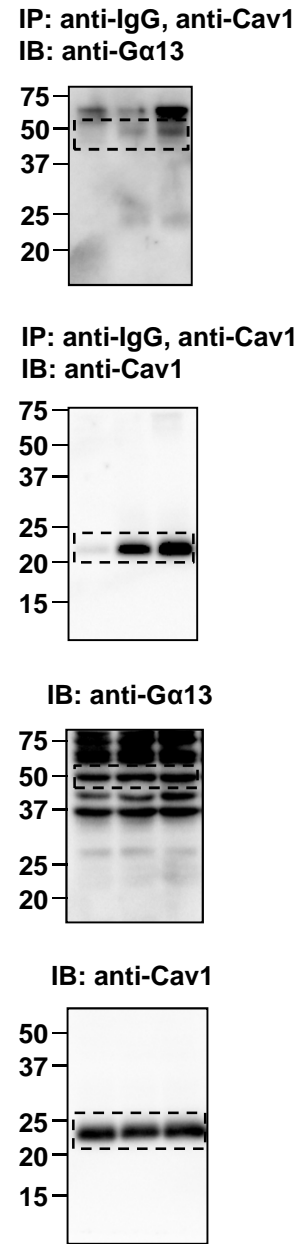

Fig. 6d

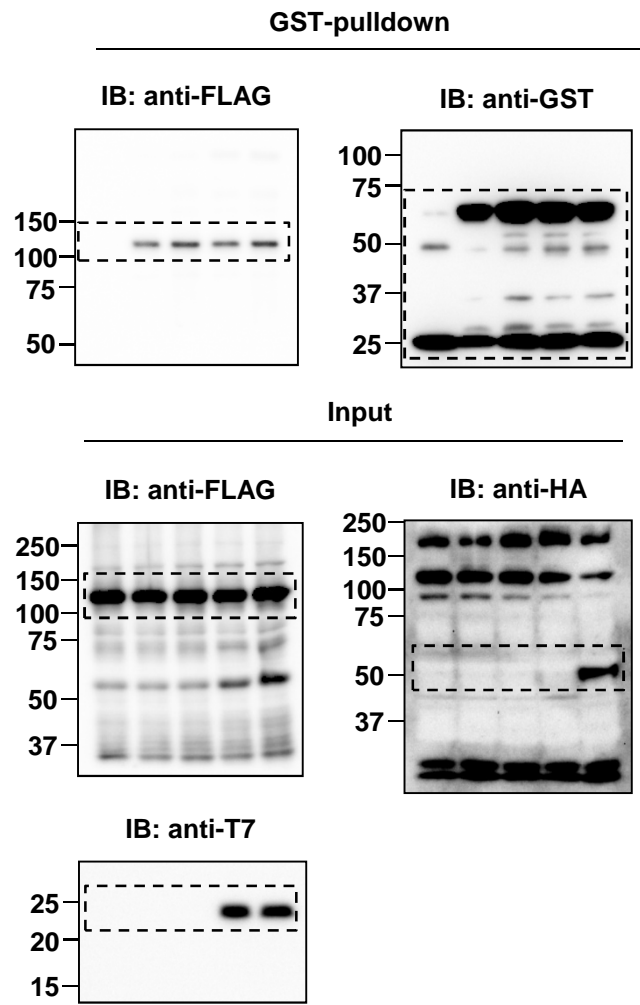

Fig. 6e

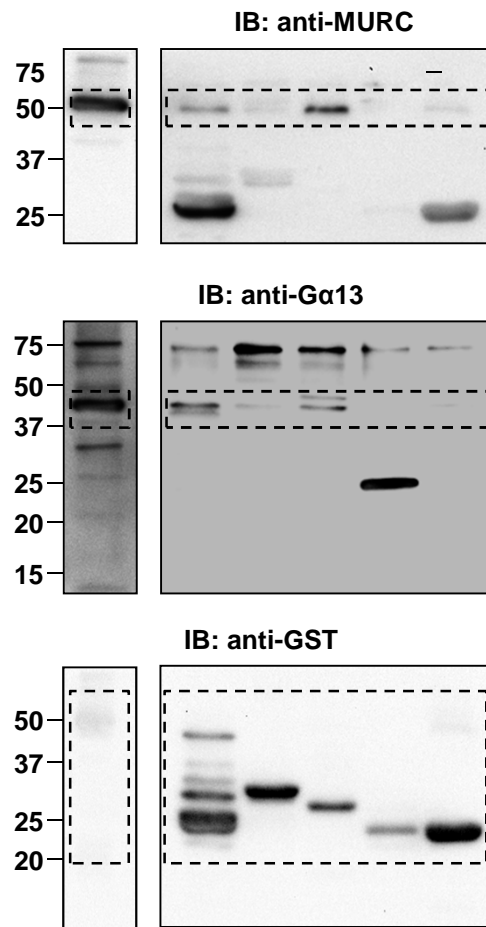

Fig. 7b

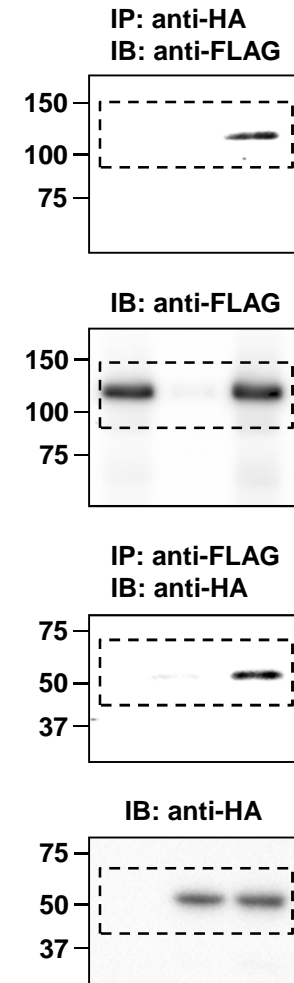

Fig. 7d

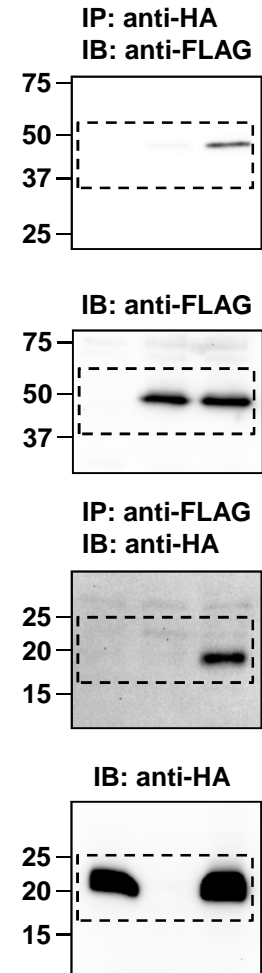

**Fig. S1a**

IB: anti-Cav1

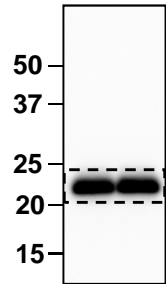

**Fig. S1b**

IB: anti-MURC

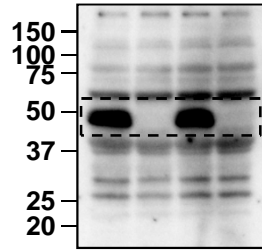

**Fig. S3a**

IB: anti-MURC

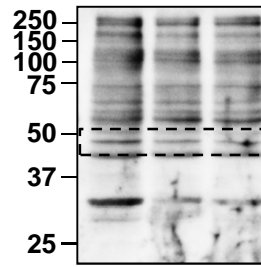

IB: anti-GAPDH

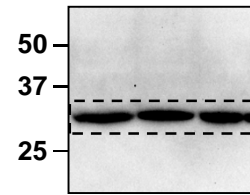

**Fig. S3g**

IB: anti-pMYPT1

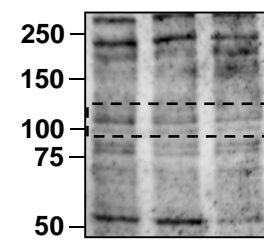

**Fig. S3h**

IB: anti-pMYPT1

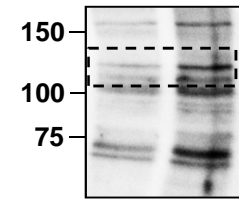

IB: anti-Na<sup>+</sup>-K<sup>+</sup> ATPase

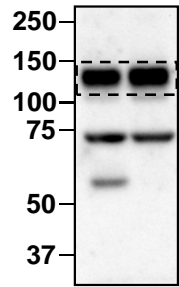

IB: anti-GAPDH

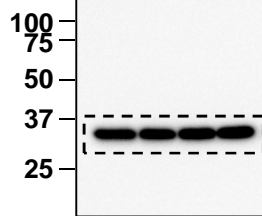

**Fig. S3c**

IB: anti-MURC

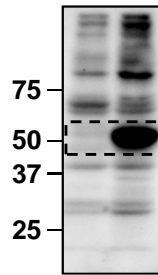

IB: anti-FLAG

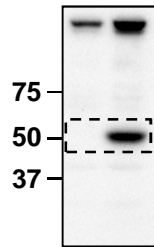

IB: anti-GAPDH

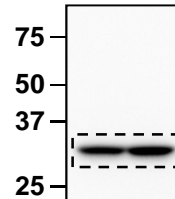

IB: anti-MYPT1

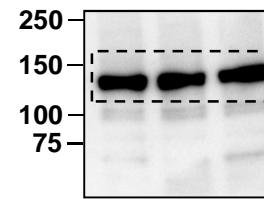

IB: anti-MYPT1

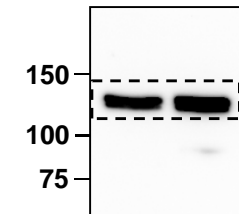

IB: anti-GAPDH

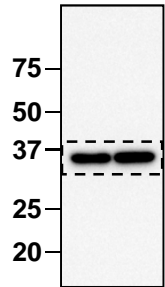

IB: anti-MURC

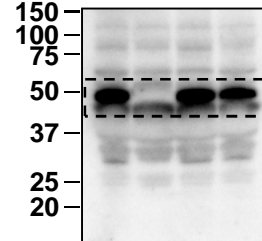

IB: anti-GAPDH

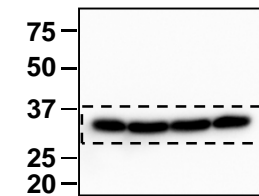

IB: anti-pMLC2

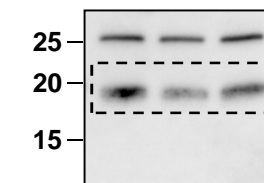

IB: anti-pMLC2

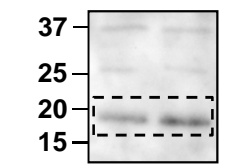

IB: anti-MLC2

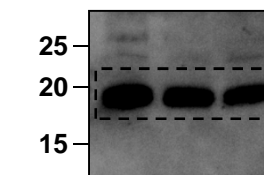

IB: anti-MLC2

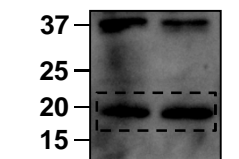

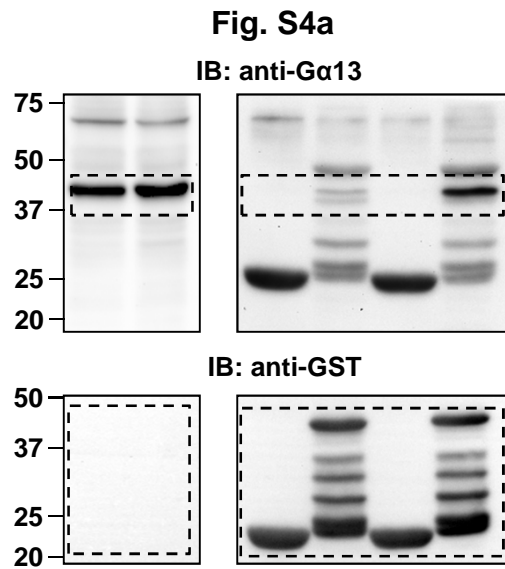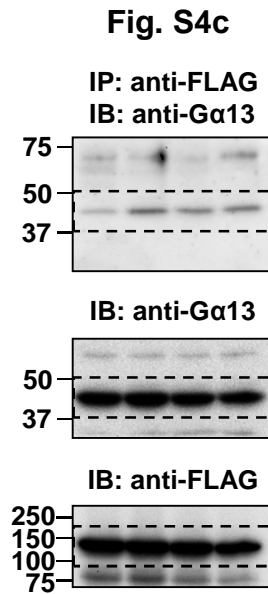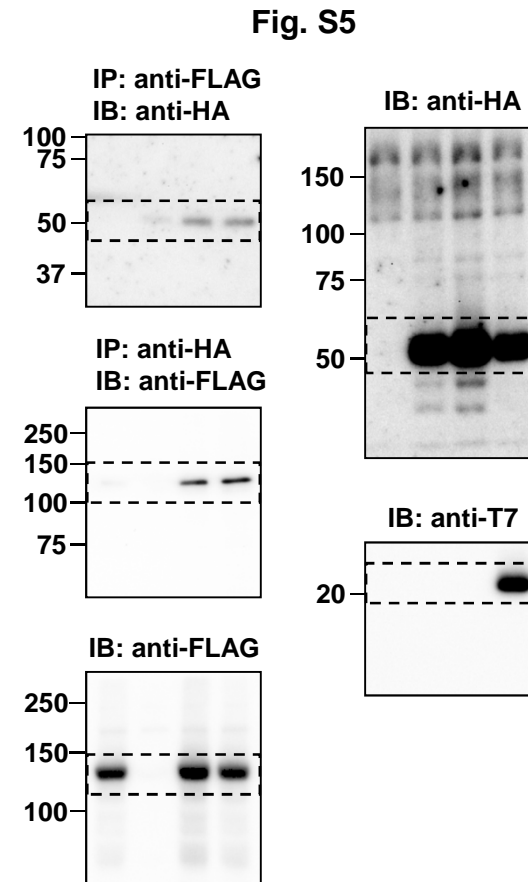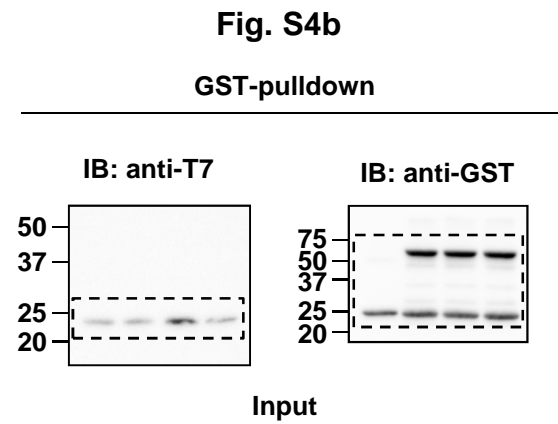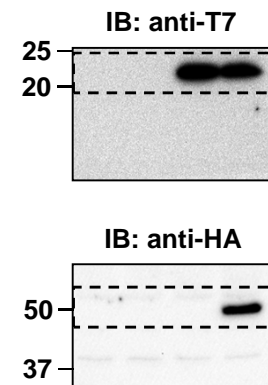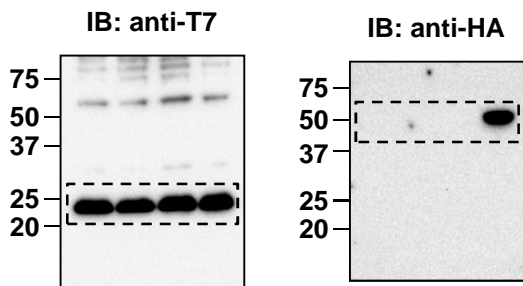

**Supplementary Figure 6. Uncropped blots in main and supplementary figures.**

Full immunoblot images with the corresponding figure and panel numbers are shown.

Supplementary Table 1. Blood pressure, heart rate, and echocardiographic analyses of WT and *Murc*<sup>-/-</sup> mice under normoxia

|            | WT (n=10)   | <i>Murc</i> <sup>-/-</sup> (n=11) |
|------------|-------------|-----------------------------------|
| sBP (mmHg) | 93.5 ± 1.2  | 94.1 ± 1.3                        |
| dBP (mmHg) | 62.8 ± 1.7  | 62.0 ± 1.6                        |
| HR (bpm)   | 676.0 ± 9.3 | 665.5 ± 16.5                      |
| LVDd (mm)  | 4.41 ± 0.30 | 4.07 ± 0.06                       |
| LVDs (mm)  | 2.90 ± 0.04 | 2.84 ± 0.03                       |
| IVSTd (mm) | 0.60 ± 0.03 | 0.53 ± 0.02                       |
| PWTd (mm)  | 0.59 ± 0.18 | 0.56 ± 0.01                       |
| FS (%)     | 29.3 ± 0.4  | 30.1 ± 0.7                        |
| EF (%)     | 56.7 ± 0.7  | 57.8 ± 0.9                        |

sBP, systolic blood pressure; dBP, diastolic blood pressure; HR, heart rate; LVDd, left ventricular dimension at end-diastole; LVDs, left ventricular dimension in systole; IVSTd, interventricular septum thickness at end-diastole; PWTd, left ventricular posterior wall thickness at end-diastole; FS, fractional shortening; EF, ejection fraction. Values are expressed as means ± SEM.

Supplementary Table 2. Morphometric and echocardiographic analyses of *Murc<sup>fl/fl</sup>* and cKO mice under normoxia

|               | <i>Murc<sup>fl/fl</sup></i> (n=3) | cKO (n=3)   |
|---------------|-----------------------------------|-------------|
| BW (g)        | 29.2 ± 0.3                        | 27.6 ± 0.8  |
| HW (mg)       | 120.6 ± 1.8                       | 122.7 ± 3.3 |
| TL (mm)       | 17.2 ± 0.17                       | 16.7 ± 0.19 |
| HW/BW (mg/g)  | 4.13 ± 0.02                       | 4.44 ± 0.01 |
| HW/TL (mg/mm) | 7.01 ± 0.04                       | 7.34 ± 0.12 |
| LVDd (mm)     | 3.81 ± 0.03                       | 3.79 ± 0.13 |
| LVDs (mm)     | 2.65 ± 0.03                       | 2.56 ± 0.05 |
| IVSTd (mm)    | 0.62 ± 0.02                       | 0.64 ± 0.02 |
| PWTd (mm)     | 0.61 ± 0.01                       | 0.63 ± 0.03 |
| FS (%)        | 30.4 ± 1.1                        | 32.3 ± 2.1  |
| EF (%)        | 58.6 ± 1.6                        | 61.2 ± 2.8  |

BW, body weight; HW, heart weight; TL, tibial length; LVDd, left ventricular dimension at end-diastole; LVDs, left ventricular dimension in systole; IVSTd, interventricular septum thickness at end-diastole; PWTd, left ventricular posterior wall thickness at end-diastole; FS, fractional shortening; EF, ejection fraction. Values are expressed as means ± SEM.



Supplementary Table 3. Morphometric and echocardiographic analyses of *Murc<sup>fl/fl</sup>* and cKO mice exposed to hypoxia

|               | <i>Murc<sup>fl/fl</sup></i> (n=3) | cKO (n=3)   |
|---------------|-----------------------------------|-------------|
| BW (g)        | 21.9 ± 1.5                        | 24.0 ± 0.8  |
| HW (mg)       | 111.4 ± 4.0                       | 128.2 ± 2.6 |
| TL (mm)       | 17.7 ± 0.18                       | 18.3 ± 0.15 |
| HW/BW (mg/g)  | 5.11 ± 0.26                       | 5.36 ± 0.12 |
| HW/TL (mg/mm) | 6.30 ± 0.16                       | 7.01 ± 0.09 |
| LVDd (mm)     | 3.41 ± 0.22                       | 3.51 ± 0.11 |
| LVDs (mm)     | 2.26 ± 0.13                       | 2.37 ± 0.12 |
| IVSTd (mm)    | 0.58 ± 0.02                       | 0.59 ± 0.02 |
| PWTd (mm)     | 0.59 ± 0.01                       | 0.61 ± 0.02 |
| FS (%)        | 34.0 ± 1.0                        | 32.6 ± 1.4  |
| EF (%)        | 64.1 ± 1.3                        | 61.9 ± 2.0  |

BW, body weight; HW, heart weight; TL, tibial length; LVDd, left ventricular dimension at end-diastole; LVDs, left ventricular dimension in systole; IVSTd, interventricular septum thickness at end-diastole; PWTd, left ventricular posterior wall thickness at end-diastole; FS, fractional shortening; EF, ejection fraction. Values are expressed as means ± SEM.
